# Supplementary material for: Efficient promotion of phosphate diester cleavage by a face-to-face cyclodextrin dimer without metal
Source: Royal Society of Chemistry journal article supplement (doi:10.1039/c2cc31490h), 2012-01-01
Supplement: c2cc31490h.pdf [file c2cc31490h.pdf]

## Supporting Information

### Efficient promotion of phosphate diester cleavage by a face-to-face cyclodextrin dimer without metal

Ping Hu, Gao-Feng Liu, Liang-Nian Ji and Zong-Wan Mao\*

*MOE Key Laboratory of Bioinorganic and Synthetic Chemistry, School of Chemistry and Chemical Engineering, Sun Yat-Sen University, Guangzhou 510275, China*

E-mail: cesmzw@mail.sysu.edu.cn

#### Abbreviations

HPNP 2-hydroxypropyl-4-nitrophenyl phosphate

NPP 4-nitrophenol phosphate

#### Experimental Procedures

**Materials:** 2,6-Bis(bromomethyl)-pyridine, Bis(4-nitrophenyl) phosphate (**BNPP**) were purchased from Sigma-Aldrich; 3-mono-amino- $\beta$ -cyclodextrin hydrate were purchased from TCI; diisopropylethylamine were purchased from Alfa Aesar. Meso-tetra(4-sulfonatophenyl) porphine (**TPPS**) was purchased from Frontier Scientific. These reagents were used without further purification. DMF were dried over CaH<sub>2</sub> and then distilled under reduced pressure prior to use. Water used in all physical measurement experiments was purified with Milli-Q Water Purification System and the resistivity of the treated water is more than 18 Mega $\Omega$  cm<sup>-1</sup>.

**Physical Measurements:** <sup>1</sup>H NMR, <sup>13</sup>C NMR and <sup>31</sup>P NMR spectra were recorded on a Varian Mercury plus 300 spectrometers and the <sup>13</sup>C NMR and <sup>31</sup>P NMR are proton-decoupled. Elemental contents were analyzed by a Perkin-Elmer 240 elemental analyzer. ESI-MS spectra were performed on a Thermo LCQ-DECA-XP spectrometer. UV-vis spectra were monitored with a Varian Cary 100 UV/Vis spectrophotometer equipped with a temperature controller ( $\pm$  0.1 K).

**Potentiometric Titration:** An automatic titrator (Metrohm 702GPD Titrino) coupled to a Metrohm electrode was used and calibrated according to the Gran method.<sup>1</sup> The electrode system was calibrated with buffers and checked by titration of HClO<sub>4</sub> with NaOH solution (0.10 M). The thermostated cell contained 25 mL of 1.0 mM species in aqueous solutions with the ionic strength maintained at 0.10 M by sodium perchlorate. All titrations were carried out in aqueous solutions under nitrogen at 298  $\pm$  0.1 K, and initiated by adding fixed volumes of 0.10 M standard NaOH in small increments to the titrated solution. Triplicate measurements were performed, for which the experimental error was below 1%. The titration data were fitted from the raw data with the Hyperquad 2000 program to calculate the log $\beta$  and the pK<sub>a</sub> values of species.

**Kinetic Experimental Details:** The rate of **BNPP** cleavage was measured by an initial slope method following the absorption increase at the 400 nm of the released 4-nitrophenoxide (**NP<sup>-</sup>**) in aqueous solution at  $308 \pm 0.1$  K. At this wavelength, the absorbance of the ester substrate was negligible. MES (pH 5.70-6.80), MOPSO (pH 6.80-7.20), HEPES (pH 7.20-8.10), TAPS (pH 8.10-9.00), and CHES (pH 9.00-9.60) buffers were used (50 mM), and the ionic strength was adjusted to 0.1 M with NaClO<sub>4</sub>. The pH of the solution was measured after each run, and all kinetic runs with pH variation larger than 0.1 were excluded. The substrate **BNPP**, buffers, and **L** and **CuL** in aqueous solution were freshly prepared. The reactions were initiated by injecting a small amount of **BNPP** into the buffer solutions of **L** and **CuL** and followed by fully mixing at  $308 \pm 0.1$  K. The visible absorption increase was recorded immediately and was followed generally until 5% formation of 4-nitrophenolate, where  $\epsilon$  values for 4-nitrophenolate were 1733 (pH 6.0), 4069 (pH 6.5), 9137 (pH 7.0), 13745 (pH 7.5), 16306 (pH 8.0), 17340 (pH 8.5), 17694 (pH 9.0), 17810 (pH 9.5) at 400 nm (ref. 8*d-f* in main article). When we investigate the inhibition of **TPPS**, the concentration of **TPPS** in sample and reference cells were same in order to exclude the influence of the Soret-band absorbance of **TPPS** near  $\lambda = 400$  nm.

The initial pseudo-first-order rate constants of **L** and **CuL**,  $k_{in}$  (s<sup>-1</sup>), were obtained directly from a plot of the 4-nitrophenolate concentration versus time by the method of initial rates which was linear with  $R > 0.995$ . To correct for the spontaneous cleavage of **BNPP**, each reaction was measured against a reference cell which was identical to the sample cell in composition except for the absence of **L** and **CuL**. Errors on  $k_{obs}$  values were less than 15%. The  $k_{in}$  (s<sup>-1</sup>) at different **L** or **CuL** concentrations were measured. Then, the second-order rate constants  $k_{obs}$  (M<sup>-1</sup> s<sup>-1</sup>) were determined as the slope of the linear plots of  $k_{in}$  versus [**L**] or [**CuL**] (release of two **NP<sup>-</sup>** moles per mole of **BNPP** was taken into account). The  $k_{obs}$  (M<sup>-1</sup> s<sup>-1</sup>) at different pH were measured respectively (see Fig. 1 in main article and Fig. S6, ESI). The data of **L** was fitted to eqn. 1 to give the  $k_{cat}$  of each species.

$$k_{obs} = \frac{(10^{-3\text{pH}-\text{p}K_1})k_{H_2L} + (10^{-2\text{pH}-\text{p}K_1-\text{p}K_2})k_{HL} + (10^{-\text{pH}-\text{p}K_1-\text{p}K_2-\text{p}K_3})k_L + (10^{-\text{p}K_1-\text{p}K_2-\text{p}K_3-\text{p}K_4})k_{L^-}}{10^{-4\text{pH}} + 10^{-3\text{pH}-\text{p}K_1} + 10^{-2\text{pH}-\text{p}K_1-\text{p}K_2} + 10^{-\text{pH}-\text{p}K_1-\text{p}K_2-\text{p}K_3} + 10^{-\text{p}K_1-\text{p}K_2-\text{p}K_3-\text{p}K_4}}$$

eqn. 1

The effect of **BNPP** concentration (shown as Fig. 2 in main article) was carried out by varying the **BNPP** concentration at constant concentration of the **L**. The non-catalyzed reaction constant  $k_{uncat} = 4.0 \times 10^{-11}$  s<sup>-1</sup> was from ref. 9*b* in main article.

## Synthesis of **L**

The synthesis of **L** was modified from the method from ref. 9*d* in main article. 3-mono-amino- $\beta$ -cyclodextrin (315 mg, 0.278 mmol) and diisopropylethylamine (90 mg, 0.696 mol) was added to 20 ml of DMF (dried over CaH<sub>2</sub> and redistilled), followed by 2,6-bis(bromomethyl)pyridine (30 mg, 0.113 mmol). This mixture was stirred and heated up to 70 °C for 12 hours and diluted by 200 ml acetone. Then light-yellow precipitate was found. The crude product was collected by centrifugation and washed with acetone, EtOH and Et<sub>2</sub>O. Sephadex G-25 column chromatogram (mobile phase: 0.1 M NH<sub>3</sub>·H<sub>2</sub>O) was employed to purify the crude product which was detected by TLC. The product layer was collected, evaporated and dried. White, moisture-sensitive solid was found (180mg, 57.4% yield) (ESI-MS)  $m/z$  (calculated) = 1186.41 (L+2H<sup>+</sup>),

$m/z$  (found) = 1186.24 ( $L+2H^+$ ); Elemental analysis calculated for  $C_{91}H_{191}N_3O_{90}$  ( $L \cdot 18H_2O$ ) (%): C 39.49, H 6.96, N 1.52. Found (%): C 39.59, H 6.86, N 1.50;  $^1H$ -NMR ( $d^6$ -DMSO, 300 MHz)  $\delta_H$ : 7.68 (t, 1H,  $J=7.6$  Hz, Py-H-4), 7.38 (d, 2H,  $J=7.8$  Hz, Py-H-3), 5.81-5.45 (m, 26H, OH-2,3), 4.91-4.78 (m, 14H, H-1), 4.65-4.36 (m, 14H, OH-6), 3.96-3.49 (m, 60H, H-3,5,6 and  $PyCH_2$ ), 3.47-3.22 (m, 64H, H-2,4 and  $18H_2O$ ), 2.69-2.67 (w, 2H, NH-3).  $^{13}C$ -NMR ( $d^6$ -DMSO, 75MHz)  $\delta_C$ : 159.66, 142.52, 137.64, 124.88, 120.69, 107.43, 104.78, 103.96, 102.56, 82.51, 82.00, 81.06, 76.96, 73.93, 72.90, 72.40, 60.66, 60.16, 52.66.

### Synthesis of CuL

**L** (200 mg, 0.0723 mmol) was dissolved in 1ml  $H_2O$ , added by  $Cu(ClO)_2 \cdot 6H_2O$  (200mg, 0.539 mmol) in 1ml EtOH. This mixture was added to 40 ml EtOH and blue precipitated was found and collected by centrifugation and washed with EtOH and  $Et_2O$ . Light-blue powder (181 mg, 84.6% yield) was found. (ESI-MS)  $m/z$  (calculated) = 1217.37 ( $CuL^{2+}$ ),  $m/z$  (found) = 1217.00 ( $CuL^{2+}$ ); Elemental analysis calculated for  $C_{91}H_{183}Cl_2CuN_3O_{94}$  (**CuL**  $\cdot 18H_2O$ ) (%): C 36.95, H 6.24, N 1.42. Found (%): C 36.87, H 6.15, N 1.45.

### The BNPP cleavage product analysis

Fig. 3 in main article showed that the time dependent  $^{31}P$ -NMR spectrum of the cleavage process of **BNPP** in the presence of **L** at pH 9.0 and  $308 \pm 0.1K$  with  $[L] = 5$  mM and  $[BNPP] = 10$  mM. The chemical shift of **BNPP** was -11.18 ppm and two signals of products were found. The one is at  $\delta = 3.91$  is similar to phosphorylated ethanolamine ( $\delta = 3.8$  ppm from ref. 12 in main article) so we propose that this peak correspond to phosphorylated **L** monoester (**PL**). It's confirmed by ESI-MS (Fig. S4) that  $m/z$  (calculated) = 1224.38,  $m/z$  (found) = 1224.38. Furthermore, it is the only final product.

Two  $NP^-$  are released is also confirmed by the detection of  $[NP^-]_{final} / [PL]_{final}$  as shown in Fig. S3. The concentration of  $NP^-$  in this sample is calculated from the absorbance at  $\lambda = 400$  nm and the concentration of **PL** and **BNPP** are calculated from NMR spectra. Before the detection on uv-vis spectroscopy, the original sample was diluted 300 times with same buffer at same pH. After 2 weeks this reaction mixture contain:  $[BNPP]_{final} = 5.7$  mM,  $[PL]_{final} = 4.3$  mM and  $[NP^-]_{final} = 8.5$  mM. So the ratio of  $[NP^-]_{final} / [PL]_{final}$  is 1.98 which means 2 mole  $NP^-$  are released when 1 mole **BNPP** is cleaved. In Fig. 3 in main article, the chemical shift of the other signal ( $\delta = -6.14$ ) is similar with **HPNP** ( $\delta = -5.48$  ppm from ref. 9a in main article) and arylphosphorylethanolamine ( $\delta = -5.5$  ppm from ref. 12 in main article) so it correspond to 4-nitrophenol phosphorylated **L** diester (**NPPL**) as middle product. The possibility of the formation of **NPP** was also excluded because the chemical shift of **NPP** was near zero ( $\delta = -0.85$  ppm from ref. 9a in main article).

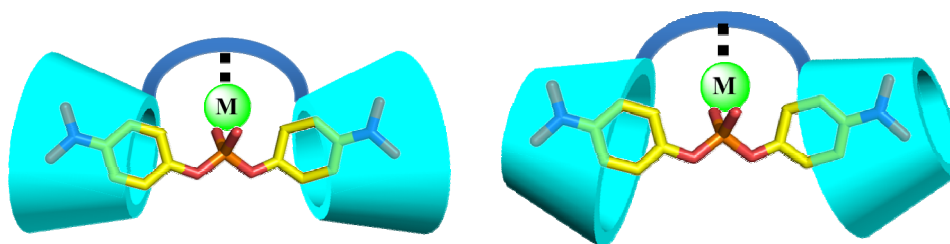

**Scheme S1** The back-to-back (left) and face-to-face (right) CD dimer complex.

**Table S1** The thermodynamic parameters of  $\text{CuL}^a$ .

| CuL        |                  |                  |
|------------|------------------|------------------|
| $\log K_f$ | $\text{p}K_{a1}$ | $\text{p}K_{a2}$ |
| 12.40      | 6.01             | 9.54             |

<sup>a</sup> Ion strength was supported by 0.1 M  $\text{NaClO}_4$ ,  $T = 298$  K. These data allowed the determination of the complex formation constant ( $K_f$ ) and the deprotonation constant ( $K_a$ ) of two copper-bound species.

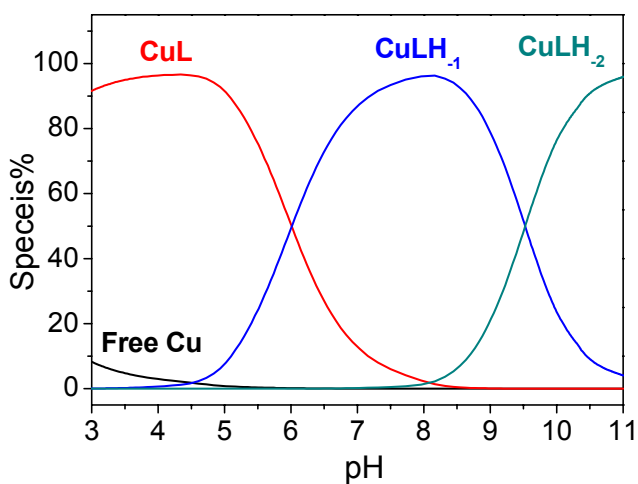

**Fig. S1** Species distribution of  $\text{CuL}$  on  $\text{pH } I = 0.1$  M ( $\text{NaClO}_4$ ) and  $T = 298 \pm 0.1$  K

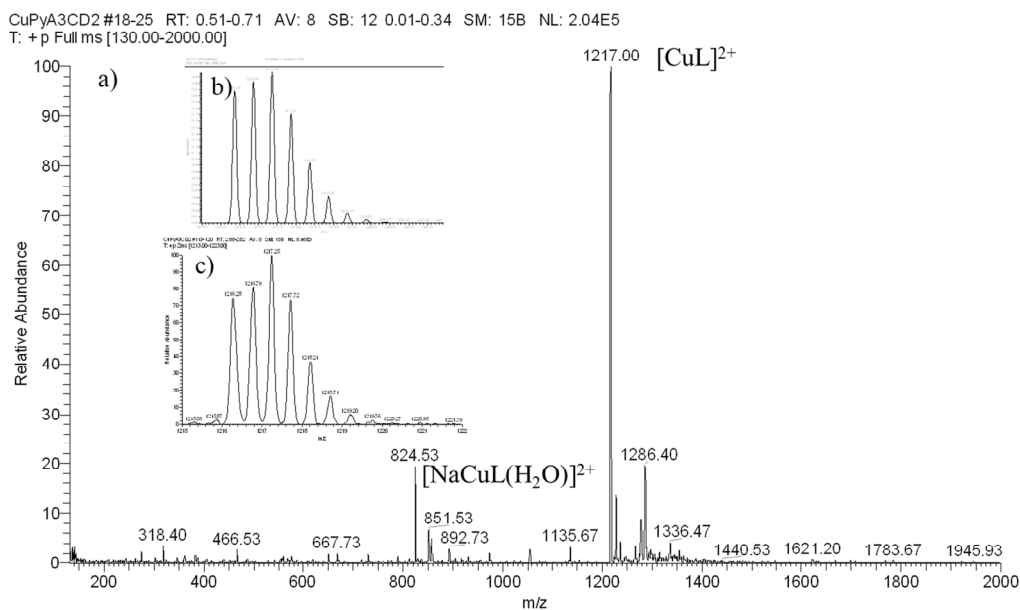

**Fig. S2** Positive charge ESI-MS spectra of CuL detected in a neutral solution: a) Full spectrum; b) Bivalence ion isotopes spectrum detected; c) Bivalence ion isotopes spectrum of computer simulation.

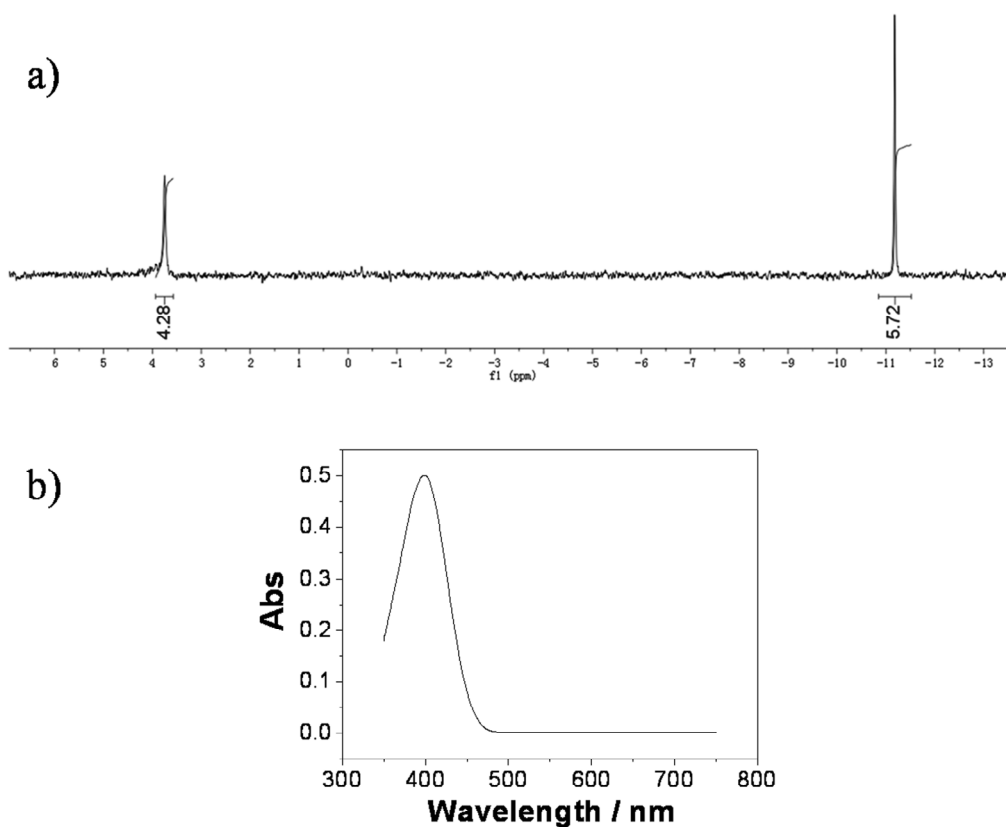

**Fig. S3** a) <sup>31</sup>P-NMR spectrum of BNPP cleavage promoted by L in the solution of 10% D<sub>2</sub>O in 50 mM CHES (I = 0.1 M with NaClO<sub>4</sub>) at pH 9.0 and 308 ± 0.1K after 2 weeks; b) uv-vis spectrum of this sample after diluted 300 times with buffer.

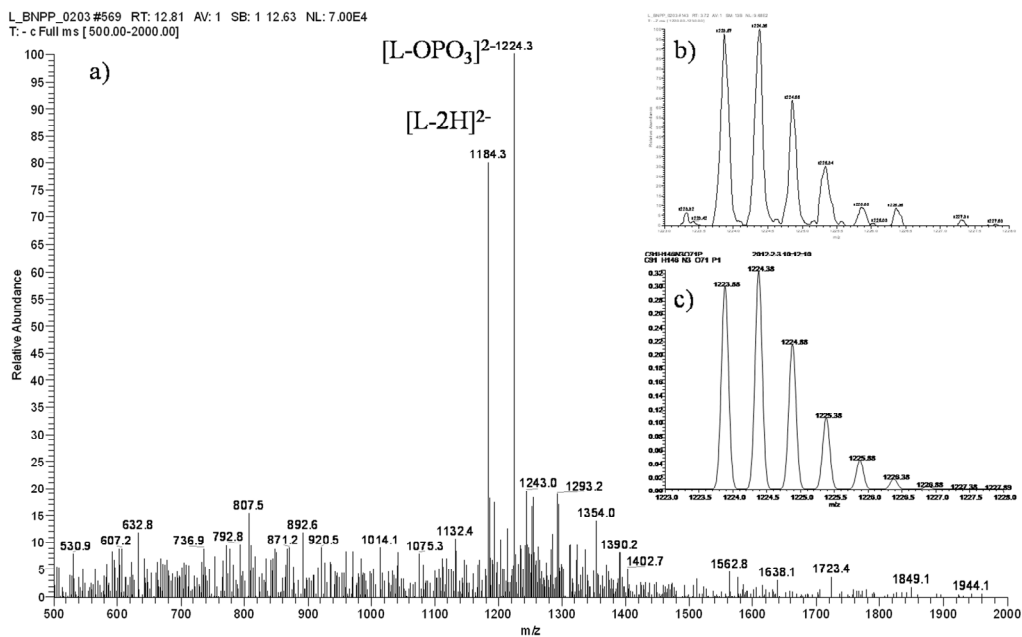

**Fig. S4** Negative charge ESI-MS spectra of mixed solution of **BNPP** and **L** for 2 week detected in water: a) Full spectrum; b) Bivalence ion isotopes spectrum detected; c) Bivalence ion isotopes spectrum of computer simulation.

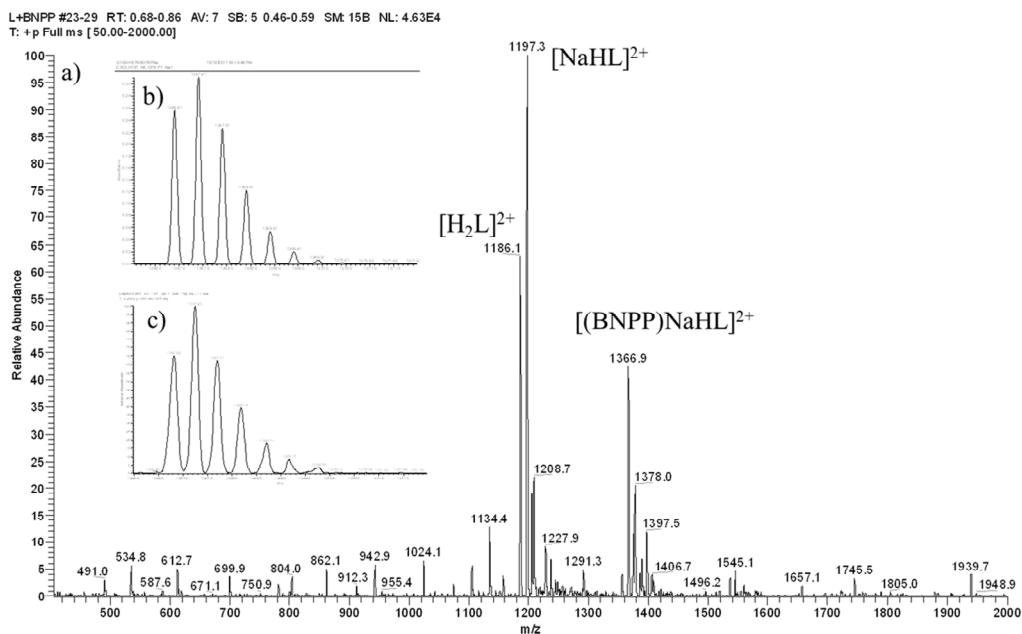

**Fig. S5** Positive charge ESI-MS spectra of mixed solution of **BNPP** and **L** in water and this sample were fresh prepared.  $[L] = [BNPP] = 10$  mM a) Full spectrum; b) Bivalence ion isotopes spectrum detected; c) Bivalence ion isotopes spectrum of computer simulation.

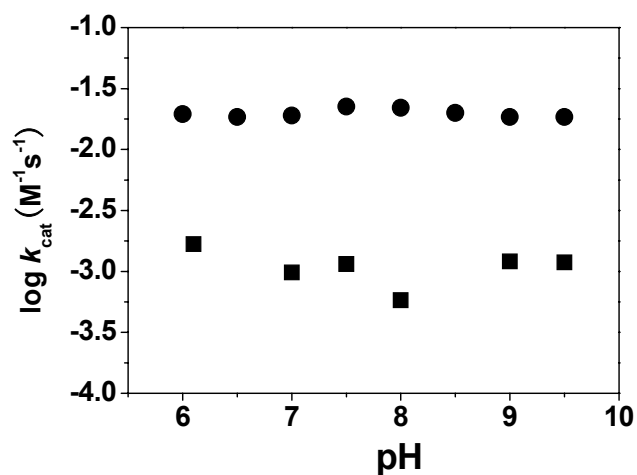

**Fig. S6** The second-order rate constants ( $k_{\text{obs}}$ ) of **BNPP** cleavage in the presence of **L** (●) and **CuL** (■) in different pH conditions.  $I = 0.1 \text{ M}$  ( $\text{NaClO}_4$ ),  $T = 308 \pm 0.1 \text{ K}$  and  $[\text{BNPP}] = 1 \text{ mM}$ .

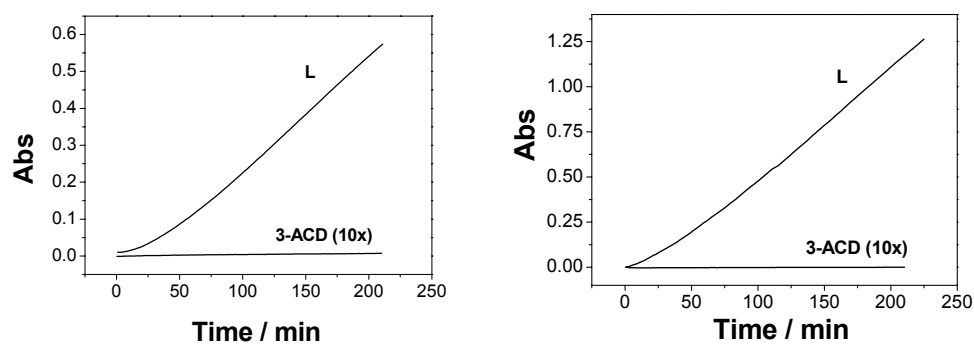

**Fig. S7** The initial rate constants ( $k_{\text{in}}$ ) of **BNPP** cleavage in the presence of  $0.1 \text{ mM}$  **L** or  $1 \text{ mM}$  **3-ACD** ( $I = 0.1 \text{ M}$  with  $\text{NaClO}_4$ ) at  $308 \pm 0.1 \text{ K}$ ,  $[\text{BNPP}] = 1 \text{ mM}$ . (left:  $\text{pH} = 7.0$ , right:  $\text{pH} = 9.0$ )

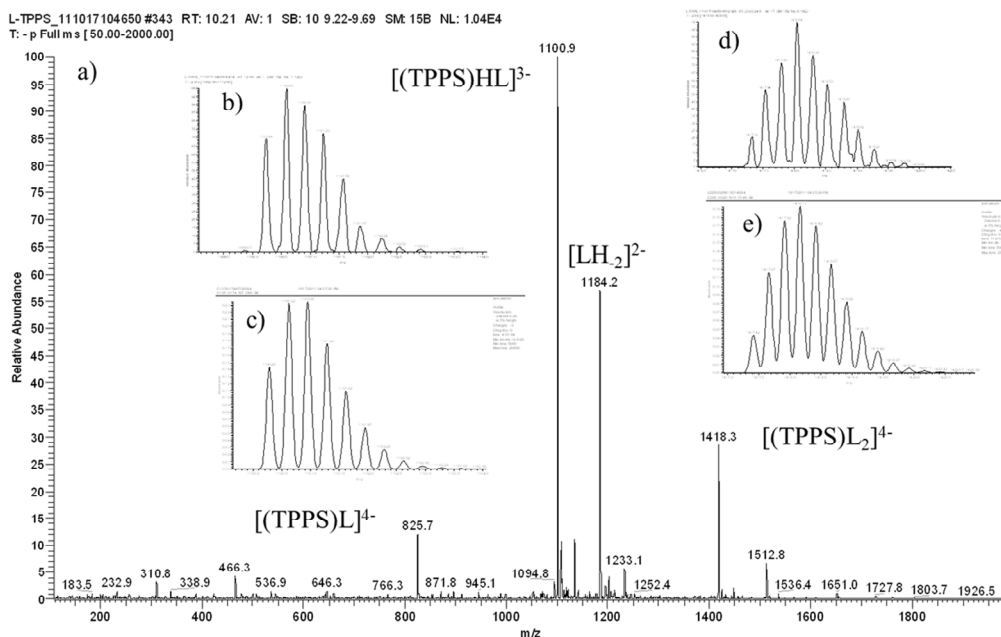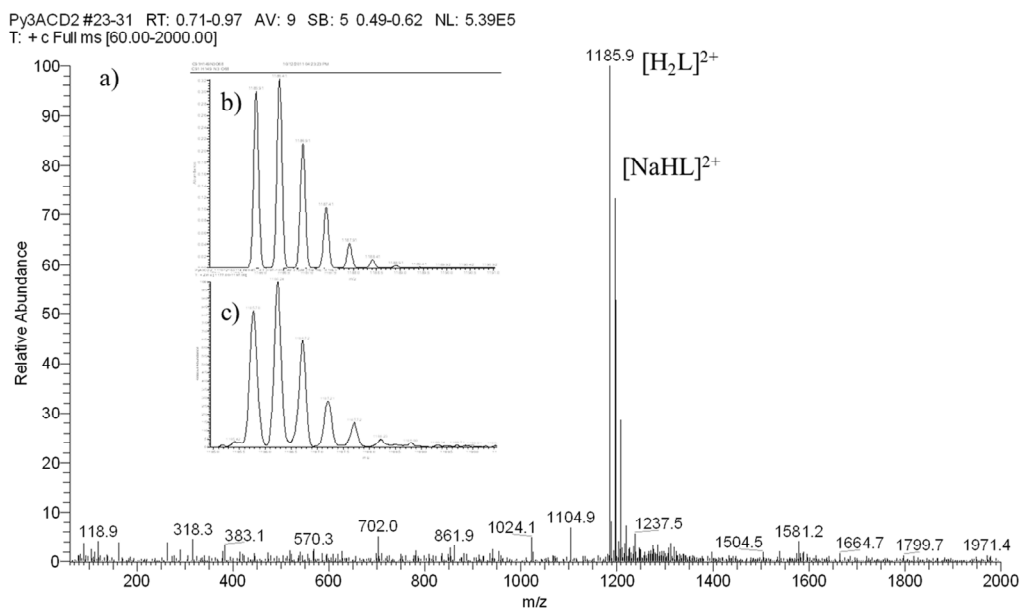



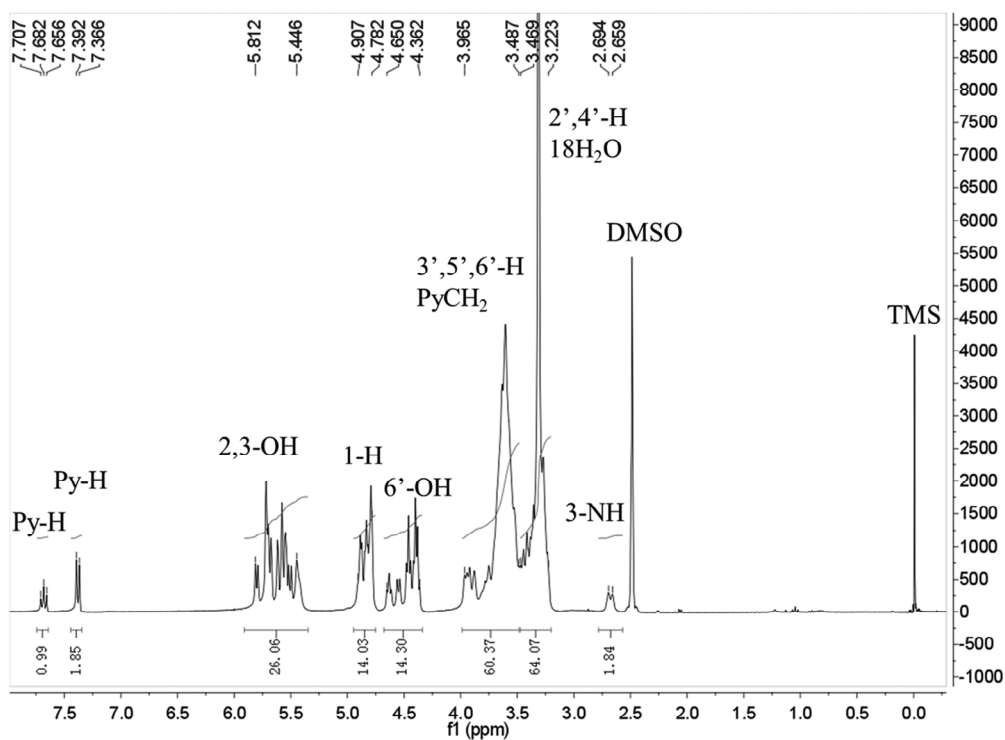

Fig. S10 <sup>1</sup>H-NMR spectrum of **L** in *d*<sub>6</sub>-DMSO.

## References

- 1 G. Gran, *Acta. Chem. Scand.*, 1950, **4**, 559.
